# Supplementary material for: Correlation of polymeric micelle sizes and their cellular internalization in vitro and tumor targeting in vivo
Source: Royal Society of Chemistry journal article supplement (doi:10.1039/c4ra12110d), 2014-11-14
Supplement: c4ra12110d1.pdf [file c4ra12110d1.pdf]

## Correlation of Polymeric micelle Sizes and their Cellular Internalization in Vitro and Tumor Targeting in Vivo

F.R. Cheng,<sup>a, b#</sup> Y.J. Yang,<sup>a, c#</sup> Y. Liang,<sup>a</sup> J. Cao,<sup>a\*</sup> T. Su,<sup>a</sup> L. Jiang,<sup>a, d</sup> B. He,<sup>a</sup> X.L. Luo,<sup>b</sup> and Z.W. Gu<sup>a</sup>

<sup>a</sup> National Engineering Research Center for Biomaterials, Sichuan University, Chengdu 610065, PR China

<sup>b</sup> College of Polymer Science and Engineering of Sichuan University, Sichuan University, Chengdu 610065, PR China

<sup>c</sup> West China School of Pharmacy Sichuan University, Sichuan University, Chengdu 610065, PR China

<sup>d</sup> School of Pharmacy, Shenyang Pharmaceutical University, Shenyang, 110016, PR. China

**Table S1.** The properties of mPEG-PCL-chrysin copolymers

| Copolymer            | Mn   |       | Mw    | PDI  |
|----------------------|------|-------|-------|------|
|                      | HNMR | GPC   |       |      |
| mPEG2k-PCL2k-chrysin | 4120 | 7411  | 8428  | 1.14 |
| mPEG2k-PCL5k-chrysin | 7126 | 11451 | 15852 | 1.38 |

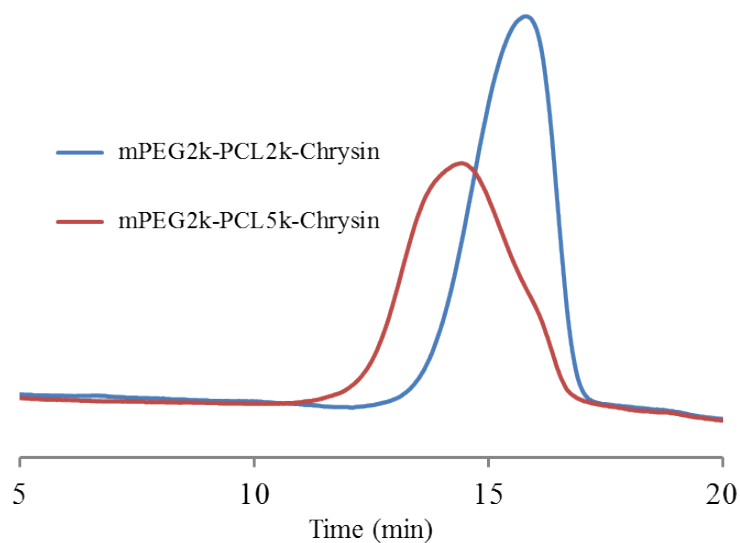

**Figure S1.** The GPC trace of mPEG-PCL-chrysin copolymers

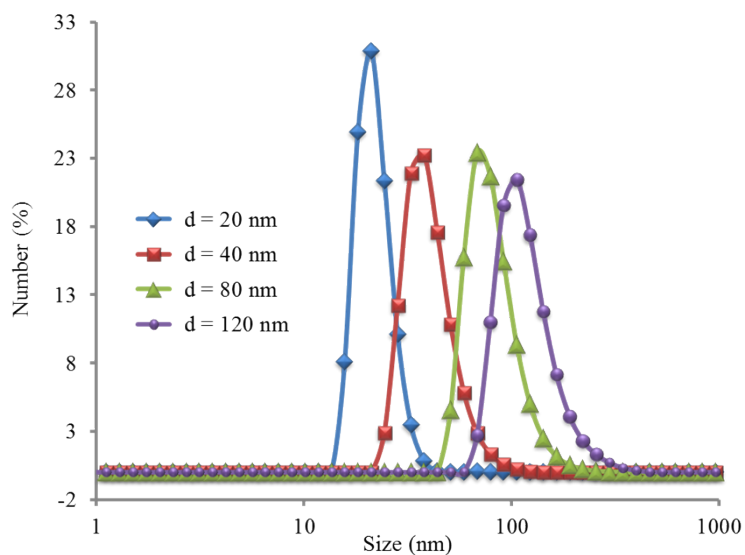

**Figure S2.** The size of Nile red loaded mPEG-PCL-chrysin micelles measured by DLS.

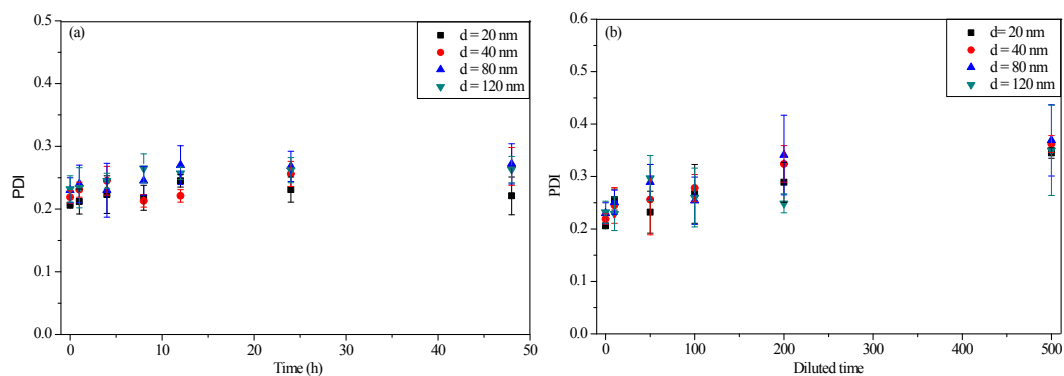

**Figure S3.** The size distribution of mPEG-PCL-chrysin copolymer micelles incubated

with (a, b) different time and (c, d) diluted with PBS for different times.

**Table S2.** The FCM results of mPEG-PCL-chrysin micelles with various sizes

| Copolymer micelles                 | 4T <sub>1</sub> |             | C2C12        |             |
|------------------------------------|-----------------|-------------|--------------|-------------|
|                                    | %Gated          | X-Mean      | %Gated       | X-Mean      |
| mPEG2k-PCL5k-chrysin <sup>a)</sup> | 99.98 ± 0.7     | 8.99 ± 0.45 | 57.55 ± 0.92 | 2.74 ± 0.08 |
| mPEG2k-PCL5k-chrysin <sup>b)</sup> | 99.97 ± 1.5     | 7.01 ± 0.09 | 61.37 ± 5.57 | 2.83 ± 0.09 |
| mPEG2k-PCL5k-chrysin <sup>c)</sup> | 99.97 ± 2.5     | 11.4 ± 0.79 | 55.89 ± 3.55 | 2.64 ± 0.58 |
| mPEG2k-PCL2k-chrysin <sup>d)</sup> | 99.99 ± 1.2     | 13.7 ± 1.17 | 60.87 ± 1.03 | 2.76 ± 0.02 |

<sup>a)</sup> micellar concentration 0.2 mg/mL; <sup>b)</sup> micellar concentration 0.8 mg/mL; <sup>c)</sup> micellar concentration 1 mg/mL; <sup>d)</sup> micellar concentration 1.5 mg/mL.
